# Supplementary material for: Two unique entangling ZnII/CdII coordination frameworks featuring multiform helical motifs based on long mixed ligands
Source: Royal Society of Chemistry journal article supplement (doi:10.1039/c3ce41127c), 2013-01-01
Supplement: c3ce41127c.pdf [file c3ce41127c.pdf]

## Supplementary Materials

**Fig. S1.** The coordination environment of the Zn(II) ion in **1**.

**Fig. S2.** Coordination environment of Cd(II) in **2**.

**Fig. S3.** The right-handed  $[Cd_2(L2)(bimh)]_n$  single helix viewed perpendicular to the *c* axis(a) and viewed from the *c* axis (b). (L2 ligands, bimh ligands and screw axis are shown as blue line, yellow line and green rods, respectively).

**Fig. S4.** Comparison of the interconnection of the helices in complex **2** (a) and document **5c** (b) viewed along the *c* axis (R represents right-handed and L represents left-handed).

**Fig. S5.** Comparison of the asymmetric unit of the complex **2** (a) and document **5c** (b)

**Fig. S5.** Comparison of PXRD pattern of the simulated pattern from the single-crystal structure determination, the as-synthesized product in compounds **2**.

**Fig. S6.** Comparison of PXRD pattern of the simulated pattern from the single-crystal structure determination, the as-synthesized product in complexes **1**(a), **2** (b)

**Fig. S7.** TGA curve of **1**, **2** under  $N_2$  atmosphere.

**Fig. S8.** Emission spectra of **1**, **2**.

**Table S1.** Selected Bond Lengths (Å) and Angles (°) for Complexes **1-2**

**Table S2.** Crystal Data and Structure Refinements for Complexes **1-2**

**Table S3.** Photoluminescent lifetime data for complex **2** at room temperature

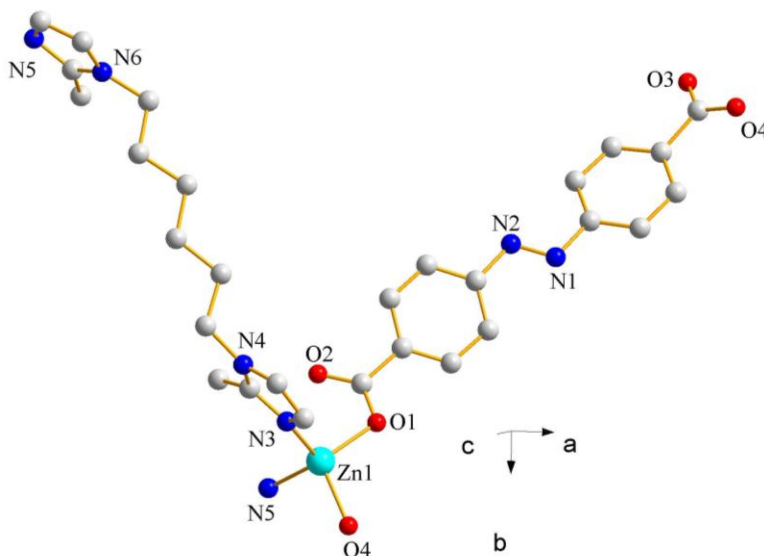

**Fig. S1.** The coordination environment of the Zn(II) ion in **1**.

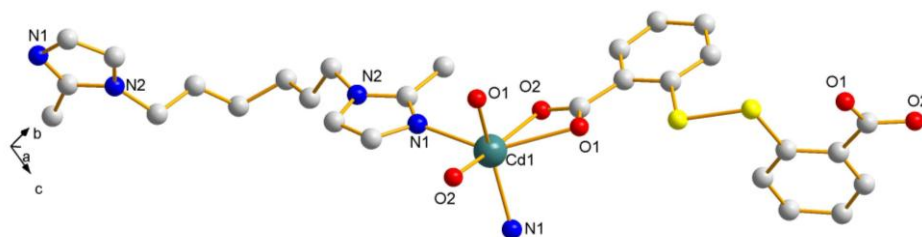

**Fig. S2.** The coordination environment of Cd(II) in **2**.

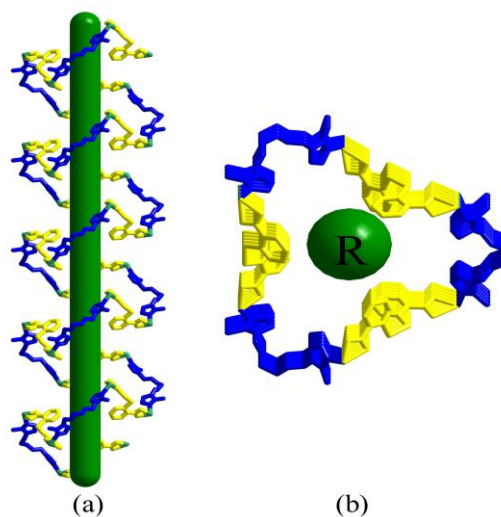

**Fig. S3.** The right-handed  $[Cd_2(dtba)(bimh)]_n$  single helix viewed perpendicular to the  $c$  axis (a) and viewed from the  $c$  axis (b) in **2**. (dtba ligands, bimh ligands and screw axis are shown as blue line, yellow line and green rods, respectively)

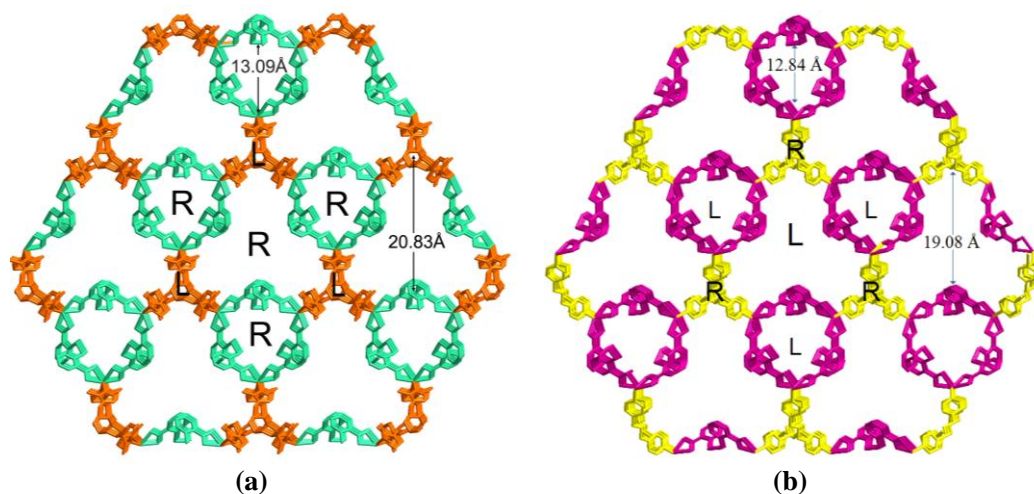

**Fig. S4.** Comparison of the interconnection of the helices in complex **2** (a) and the document **5c** (b) viewed along the  $c$  axis (R represents right-handed and L represents left-handed).

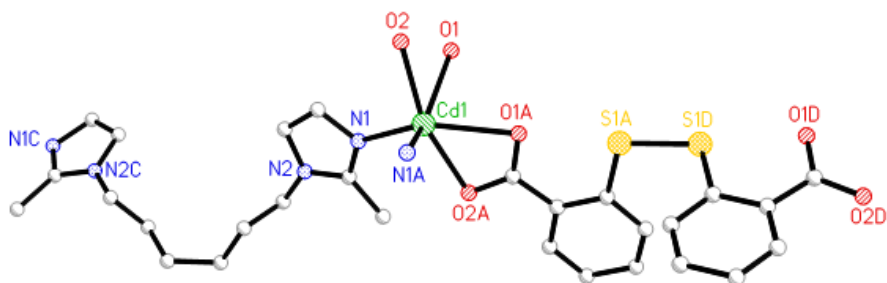

(a)

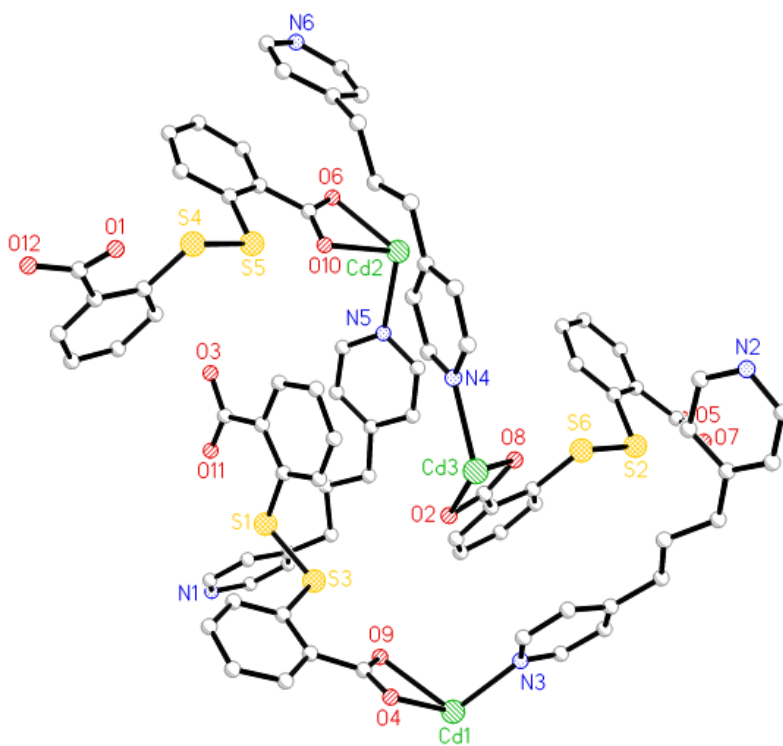

(b)

**Fig. S5.** Comparison of the asymmetric unit of the complex **2** (a) and document **5c** (b)

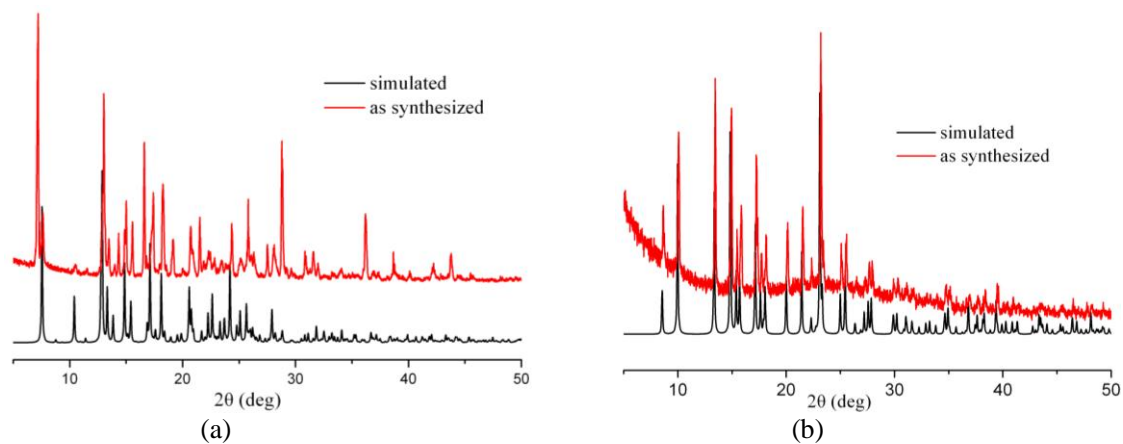

**Fig. S6.** Comparison of PXRD pattern of the simulated pattern from the single-crystal structure determination, the as-synthesized product in complexes **1**(a), **2** (b)

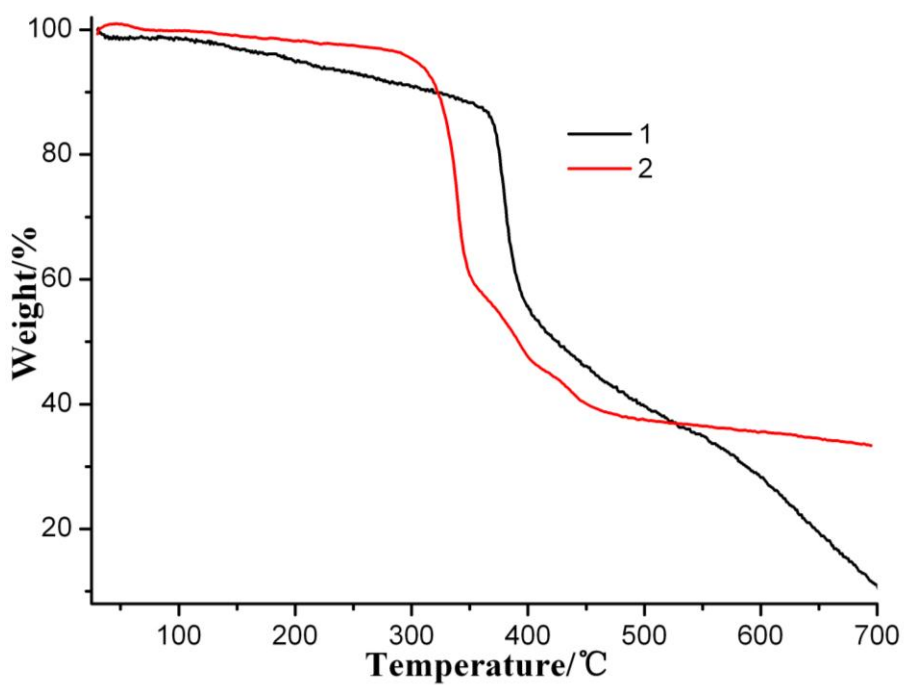

**Figure S7.** TGA curve of **1**, **2** under N<sub>2</sub> atmosphere.

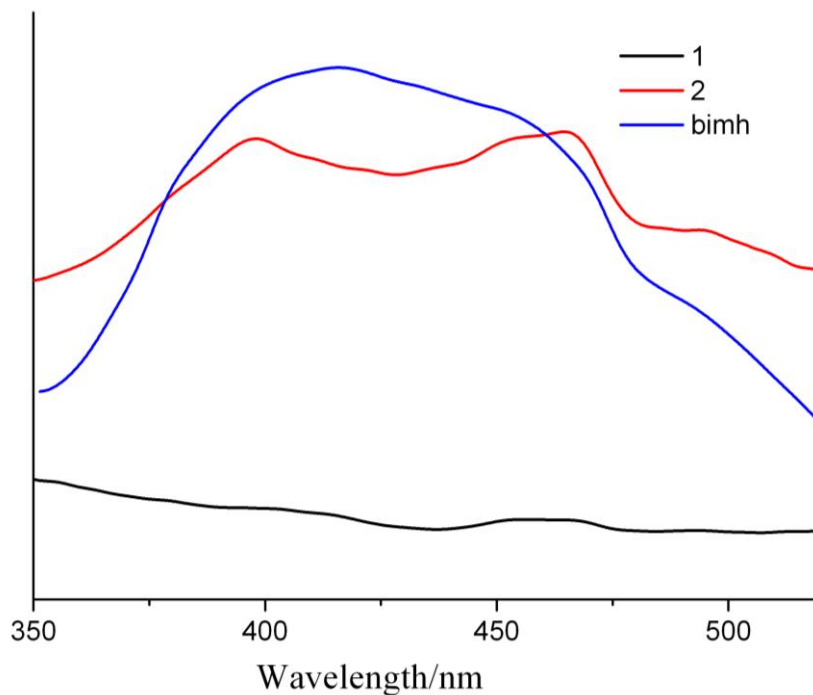

**Figure S8.** Emission spectra of **1**, **2**.

**Table S1.** Selected Bond Lengths (Å) and Angles (°) for Compounds **1-2**

| <b>1<sup>a</sup></b> |            |                    |            |
|----------------------|------------|--------------------|------------|
| N(5)-Zn(1)#1         | 2.009(3)   | O(1)-Zn(1)#2       | 1.962(2)   |
| Zn(1)-O(1)#3         | 1.962(2)   | Zn(1)-N(5)#4       | 2.009(3)   |
| Zn(1)-O(4)           | 1.969(2)   | Zn(1)-N(3)         | 2.001(3)   |
| C(22)-N(5)-Zn(1)#1   | 125.1(2)   | C(28)-N(5)-Zn(1)#1 | 128.3(2)   |
| C(19)-O(1)-Zn(1)#2   | 112.1(2)   | O(1)#3-Zn(1)-O(4)  | 106.85(10) |
| O(1)#3-Zn(1)-N(3)    | 109.76(10) | O(4)-Zn(1)-N(3)    | 114.59(11) |
| O(1)#3-Zn(1)-N(5)#4  | 118.78(11) | O(4)-Zn(1)-N(5)#4  | 97.96(10)  |
| N(3)-Zn(1)-N(5)#4    | 108.67(11) |                    |            |
| <b>2<sup>b</sup></b> |            |                    |            |
| Cd(1)-O(2)#1         | 2.249(4)   | Cd(1)-O(2)         | 2.249(4)   |
| Cd(1)-N(1)           | 2.286(4)   | Cd(1)-N(1)#1       | 2.286(4)   |
| Cd(1)-O(1)           | 2.494(4)   | Cd(1)-O(1)#1       | 2.494(4)   |
| S(1)-S(1)#2          | 2.047(3)   | O(2)#1-Cd(1)-O(2)  | 161.8(2)   |
| O(2)#1-Cd(1)-N(1)    | 95.10(15)  | O(2)-Cd(1)-N(1)    | 95.11(16)  |
| O(2)#1-Cd(1)-N(1)#1  | 95.11(16)  | O(2)-Cd(1)-N(1)#1  | 95.10(15)  |

|                      |            |                      |            |
|----------------------|------------|----------------------|------------|
| N(1)-Cd(1)-N(1)#1    | 111.5(2)   | O(2)#1-Cd(1)-O(1)    | 109.80(15) |
| O(2)-Cd(1)-O(1)      | 54.59(14)  | N(1)-Cd(1)-O(1)      | 93.12(15)  |
| N(1)#1-Cd(1)-O(1)    | 143.35(16) | O(2)#1-Cd(1)-O(1)#1  | 54.59(14)  |
| O(2)-Cd(1)-O(1)#1    | 109.80(15) | N(1)-Cd(1)-O(1)#1    | 143.35(16) |
| N(1)#1-Cd(1)-O(1)#1  | 93.12(15)  | O(1)-Cd(1)-O(1)#1    | 80.9(2)    |
| O(2)#1-Cd(1)-C(39)#1 | 27.54(15)  | O(2)-Cd(1)-C(39)#1   | 136.09(18) |
| N(1)-Cd(1)-C(39)#1   | 120.05(17) | N(1)#1-Cd(1)-C(39)#1 | 95.22(15)  |
| O(1)-Cd(1)-C(39)#1   | 95.19(17)  | O(1)#1-Cd(1)-C(39)#1 | 27.06(15)  |
| C(26)-S(1)-S(1)#2    | 104.32(18) | C(39)-O(1)-Cd(1)     | 86.9(3)    |
| C(39)-O(2)-Cd(1)     | 97.5(4)    | C(57)-N(1)-Cd(1)     | 134.2(4)   |

Symmetry transformations used to generate equivalent atoms:

|                              |                            |
|------------------------------|----------------------------|
| a #1 $-x+1/2, y-1/2, -z+1/2$ | #2 $-x+5/2, y+1/2, -z+1/2$ |
| #3 $-x+5/2, y-1/2, -z+1/2$   | #4 $-x+1/2, y+1/2, -z+1/2$ |
| b #1 $-x, -x+y, -z+1/3$      | #2 $x-y+1, -y+2, -z+2/3$   |

**Table S2.** Crystal Data and Structure Refinements for Complexes **1-2**

|                               | <b>1</b>                                                         | <b>2</b>                                                                                       |
|-------------------------------|------------------------------------------------------------------|------------------------------------------------------------------------------------------------|
| Molecular formula             | C <sub>28</sub> H <sub>30</sub> N <sub>6</sub> O <sub>4</sub> Zn | C <sub>84</sub> H <sub>90</sub> N <sub>12</sub> O <sub>12</sub> S <sub>6</sub> Cd <sub>3</sub> |
| M                             | 579.95                                                           | 1989.24                                                                                        |
| T, K                          | 296(2)                                                           | 296(2)                                                                                         |
| Crystal system                | monoclinic                                                       | trigonal                                                                                       |
| Space group                   | <i>P</i> 2(1)/ <i>n</i>                                          | <i>P</i> 3 <sub>1</sub> 2 1                                                                    |
| <i>a</i> (Å)                  | 10.5666(16)                                                      | 11.9375(13)                                                                                    |
| <i>b</i> (Å)                  | 23.405(3)                                                        | 11.9375(13)                                                                                    |
| <i>c</i> (Å)                  | 11.4006(15)                                                      | 17.2686(18)                                                                                    |
| $\beta$ (°)                   | 101.661(2)                                                       | 90                                                                                             |
| $\gamma$ (°)                  | 90                                                               | 120                                                                                            |
| <i>V</i> (Å <sup>3</sup> )    | 2761.3(7)                                                        | 2131.2(4)                                                                                      |
| <i>Z</i>                      | 4                                                                | 1                                                                                              |
| $\rho$ (g cm <sup>-3</sup> )  | 1.395                                                            | 1.550                                                                                          |
| <i>F</i> (000)                | 1208                                                             | 1014                                                                                           |
| Reflections collected /unique | 11309 / 4827                                                     | 10764 / 2522                                                                                   |

|                                        |                                  |                                  |
|----------------------------------------|----------------------------------|----------------------------------|
| $[R_{\text{int}}]$                     | [0.0361]                         | [0.0439]                         |
| Goodness-of-fit on $F^2$               | 1.030                            | 0.905                            |
| Final $R$ indices [ $I > 2\sigma(I)$ ] | $R_1 = 0.0416$ , $wR_2 = 0.0988$ | $R_1 = 0.0379$ , $wR_2 = 0.0971$ |
| $R$ indices (all data)                 | $R_1 = 0.0714$ , $wR_2 = 0.1126$ | $R_1 = 0.0527$ , $wR_2 = 0.1110$ |

**Table S3.** Photoluminescent lifetime data for complex **2** at room temperature

| complex  | Lifetime(ns)     |                  |                   |
|----------|------------------|------------------|-------------------|
|          | $\tau_1$         | $\tau_2$         | $\tau_3$          |
| <b>2</b> | 1.2881 (15.33 %) | 4.9936 (60.56 %) | 10.1345 (24.11 %) |
